# Supplementary material for: Multidimensional analysis of immune responses identified biomarkers of recent Mycobacterium tuberculosis infection
Source: PubMed Central journal article supplement (PMC8351927; doi:10.1371/journal.pcbi.1009197), 2021-07-28
Supplement: pcbi.1009197.s001.pdf [file pcbi.1009197.s001.pdf]

| Variable                                  |                           | Persistent QFT+<br>n = 30 | Recent QFT+<br>n = 29  | p-value <sup>1</sup> |
|-------------------------------------------|---------------------------|---------------------------|------------------------|----------------------|
| Age in years at enrolment (median, range) |                           | 15 (13-18)                | 16 (13-18)             | 0.489                |
| Female sex (n, %)                         |                           | 21 (70%)                  | 18 (62%)               | 0.713                |
| Ethnicity (n, %)                          | Mixed ancestry (coloured) | 26 (87%)                  | 28 (97%)               | 0.371                |
|                                           | Black                     | 4 (13%)                   | 1 (3%)                 |                      |
| School (n, %)                             | D                         | 15 (50%)                  | 18 (62%)               | 0.570                |
|                                           | E                         | 11 (37%)                  | 9 (31%)                |                      |
|                                           | F                         | 4 (13%)                   | 2 (7%)                 |                      |
| BMI (median, range)                       |                           | 20.72<br>(14.70-28.67)    | 19.34<br>(13.29-32.26) | 0.394                |
| Known TB exposure (n, %)                  | Ever                      | 7 (23%)                   | 9 (31%)                | 0.710                |
|                                           | < 1 year of enrolment     | 4 (13%)                   | 2 (7%)                 |                      |

<sup>1</sup>For age and BMI, Wilcoxon's non-parametric test was used to compare the median values between the persistent and recent QFT+ groups. For the remaining variables, a chi-squared test was used as a test of association.
