# Supplementary material for: Multidimensional analysis of immune responses identified biomarkers of recent Mycobacterium tuberculosis infection
Source: PubMed Central journal article supplement (PMC8351927; doi:10.1371/journal.pcbi.1009197), 2021-07-28
Supplement: pcbi.1009197.s002.pdf [file pcbi.1009197.s002.pdf]

| <b>Method</b>                     | <b>Explanation</b>                                                                                                                                                                                                              | <b>Author(s)</b>              | <b>R package</b> |
|-----------------------------------|---------------------------------------------------------------------------------------------------------------------------------------------------------------------------------------------------------------------------------|-------------------------------|------------------|
| missForest                        | A non-parametric imputation method that uses Random Forest models to predict the missing values and can handle mixed data                                                                                                       | Stekhoven et al. (2012) [1]   | missForest [2]   |
| <i>k</i> nearest neighbours (KNN) | An imputation method that employs the KNN algorithm to group variables with similar profiles. A weighted average of the K nearest complete variables is taken and used to impute the missing values in the incomplete variables | Troyanskaya et al. (2001) [3] | DMwR [4]         |
| Column median                     | Missing values were simply imputed with the column median of the incomplete variable                                                                                                                                            |                               |                  |
| Multiple Factor Analysis (MFA)    | Builds an MFA model on the incomplete dataset and uses the model to predict the missing values.                                                                                                                                 | Husson et al. (2013) [5]      | missMDA [6]      |

#### References

1. Stekhoven DJ, Bühlmann P. MissForest—non-parametric missing value imputation for mixed-type data. *Bioinformatics*. 2012;28(1):112–118.
2. Stekhoven DJ. missForest: Nonparametric Missing Value Imputation using Random Forest; 2013. R package version 1.4.
3. Troyanskaya O, Cantor M, Sherlock G, Brown P, Hastie T, et al. Missing value estimation methods for DNA microarrays. *Bioinformatics*. 2001;17(6):520–525.
4. Torgo L. DMwR: Functions and data for “Data Mining with R”; 2015. R package version 0.4.1.
5. Husson F, Josse J. Handling Missing Values in Multiple Factor Analysis. *Quality and Preferences*. 2013;30(2):77–85.
6. Husson F, Josse J. missMDA: Handling Missing Values with Multivariate Data Analysis; 2017. R package version 1.16.
